# Supplementary material for: Evolution of the Prevalence of Antibiotic Resistance to Staphylococcus spp. Isolated from Horses in Florida over a 10-Year Period
Source: MDPI journal article supplement (doi:10.3390/vetsci10020071), 2023-01-18
Supplement: s1 [file s1]

## Supplemental

**Table S1.**

| Variable        | by Variable     | Kendall $\tau$ | Prob>  $\tau$ |  |
|-----------------|-----------------|----------------|---------------|--|
| Ampicillin      | Amikacin        | 0.0625         | 0.6347        |  |
| Azithromycin    | Amikacin        | -0.0682        | 0.5948        |  |
| Azithromycin    | Ampicillin      | 0.4384         | 0.0003*       |  |
| Cefazolin       | Amikacin        | -0.3124        | 0.0108*       |  |
| Cefazolin       | Ampicillin      | 0.5790         | <.0001*       |  |
| Cefazolin       | Azithromycin    | 0.3943         | 0.0003*       |  |
| Chloramphenicol | Amikacin        | 0.0968         | 0.4510        |  |
| Chloramphenicol | Ampicillin      | 0.2105         | 0.0855        |  |
| Chloramphenicol | Azithromycin    | 0.2700         | 0.0185*       |  |
| Chloramphenicol | Cefazolin       | 0.0637         | 0.5602        |  |
| Clarithromycin  | Amikacin        | -0.0716        | 0.5796        |  |
| Clarithromycin  | Ampicillin      | 0.3776         | 0.0041*       |  |
| Clarithromycin  | Azithromycin    | 0.9525         | <.0001*       |  |
| Clarithromycin  | Cefazolin       | 0.2817         | 0.0229*       |  |
| Clarithromycin  | Chloramphenicol | 0.2703         | 0.0381*       |  |
| Doxycycline     | Amikacin        | 0.0756         | 0.5933        |  |
| Doxycycline     | Ampicillin      | 0.3746         | 0.0094*       |  |
| Doxycycline     | Azithromycin    | 0.5630         | <.0001*       |  |
| Doxycycline     | Cefazolin       | 0.2529         | 0.0627        |  |
| Doxycycline     | Chloramphenicol | 0.2359         | 0.0986        |  |
| Doxycycline     | Clarithromycin  | 0.5322         | 0.0002*       |  |
| Erythromycin    | Amikacin        | -0.0911        | 0.4739        |  |
| Erythromycin    | Ampicillin      | 0.4344         | 0.0003*       |  |
| Erythromycin    | Azithromycin    | 0.9281         | <.0001*       |  |
| Erythromycin    | Cefazolin       | 0.4346         | <.0001*       |  |
| Erythromycin    | Chloramphenicol | 0.3429         | 0.0026*       |  |
| Erythromycin    | Clarithromycin  | 0.9550         | <.0001*       |  |
| Erythromycin    | Doxycycline     | 0.5058         | 0.0003*       |  |
| Gentamicin      | Amikacin        | 0.5989         | <.0001*       |  |
| Gentamicin      | Ampicillin      | 0.4175         | 0.0005*       |  |
| Gentamicin      | Azithromycin    | 0.3343         | 0.0031*       |  |
| Gentamicin      | Cefazolin       | 0.1038         | 0.3381        |  |
| Gentamicin      | Chloramphenicol | 0.0954         | 0.3976        |  |
| Gentamicin      | Clarithromycin  | 0.2352         | 0.0634        |  |
| Gentamicin      | Doxycycline     | 0.1686         | 0.2290        |  |
| Gentamicin      | Erythromycin    | 0.2865         | 0.0107*       |  |
| Imipenem        | Amikacin        | 0.0075         | 0.9533        |  |
| Imipenem        | Ampicillin      | 0.6376         | <.0001*       |  |
| Imipenem        | Azithromycin    | 0.4619         | <.0001*       |  |
| Imipenem        | Cefazolin       | 0.6767         | <.0001*       |  |
| Imipenem        | Chloramphenicol | 0.1097         | 0.3384        |  |
| Imipenem        | Clarithromycin  | 0.3193         | 0.0135*       |  |
| Imipenem        | Doxycycline     | 0.3790         | 0.0074*       |  |
| Imipenem        | Erythromycin    | 0.4820         | <.0001*       |  |
| Imipenem        | Gentamicin      | 0.2109         | 0.0617        |  |
| Oxacillin       | Amikacin        | -0.1328        | 0.3344        |  |
| Oxacillin       | Ampicillin      | 0.6342         | <.0001*       |  |

| Variable     | by Variable     | Kendall $\tau$ | Prob>  $\tau$ |  |  |
|--------------|-----------------|----------------|---------------|--|--|
| Oxacillin    | Azithromycin    | 0.5744         | <.0001*       |  |  |
| Oxacillin    | Cefazolin       | 0.7607         | <.0001*       |  |  |
| Oxacillin    | Chloramphenicol | 0.1548         | 0.2018        |  |  |
| Oxacillin    | Clarithromycin  | 0.4733         | 0.0007*       |  |  |
| Oxacillin    | Doxycycline     | 0.3965         | 0.0085*       |  |  |
| Oxacillin    | Erythromycin    | 0.6226         | <.0001*       |  |  |
| Oxacillin    | Gentamicin      | 0.1508         | 0.2054        |  |  |
| Oxacillin    | Imipenem        | 0.9624         | <.0001*       |  |  |
| Penicillin   | Amikacin        | 0.0282         | 0.8315        |  |  |
| Penicillin   | Ampicillin      | 0.9391         | <.0001*       |  |  |
| Penicillin   | Azithromycin    | 0.5639         | <.0001*       |  |  |
| Penicillin   | Cefazolin       | 0.5510         | <.0001*       |  |  |
| Penicillin   | Chloramphenicol | 0.1899         | 0.1237        |  |  |
| Penicillin   | Clarithromycin  | 0.5050         | 0.0001*       |  |  |
| Penicillin   | Doxycycline     | 0.3419         | 0.0191*       |  |  |
| Penicillin   | Erythromycin    | 0.5449         | <.0001*       |  |  |
| Penicillin   | Gentamicin      | 0.3746         | 0.0019*       |  |  |
| Penicillin   | Imipenem        | 0.5972         | <.0001*       |  |  |
| Penicillin   | Oxacillin       | 0.6102         | <.0001*       |  |  |
| Rifampin     | Amikacin        | 0.2040         | 0.1116        |  |  |
| Rifampin     | Ampicillin      | 0.2283         | 0.0617        |  |  |
| Rifampin     | Azithromycin    | 0.2790         | 0.0150*       |  |  |
| Rifampin     | Cefazolin       | 0.0331         | 0.7636        |  |  |
| Rifampin     | Chloramphenicol | 0.2942         | 0.0102*       |  |  |
| Rifampin     | Clarithromycin  | 0.3571         | 0.0057*       |  |  |
| Rifampin     | Doxycycline     | 0.3168         | 0.0251*       |  |  |
| Rifampin     | Erythromycin    | 0.2983         | 0.0089*       |  |  |
| Rifampin     | Gentamicin      | 0.0885         | 0.4331        |  |  |
| Rifampin     | Imipenem        | 0.1027         | 0.3705        |  |  |
| Rifampin     | Oxacillin       | 0.1017         | 0.4017        |  |  |
| Rifampin     | Penicillin      | 0.2135         | 0.0828        |  |  |
| Tetracycline | Amikacin        | 0.4217         | 0.0012*       |  |  |
| Tetracycline | Ampicillin      | 0.4603         | 0.0002*       |  |  |
| Tetracycline | Azithromycin    | 0.0884         | 0.4442        |  |  |
| Tetracycline | Cefazolin       | 0.0825         | 0.4607        |  |  |
| Tetracycline | Chloramphenicol | 0.0110         | 0.9242        |  |  |
| Tetracycline | Clarithromycin  | 0.1432         | 0.2717        |  |  |
| Tetracycline | Doxycycline     | 0.5888         | <.0001*       |  |  |
| Tetracycline | Erythromycin    | 0.0551         | 0.6334        |  |  |
| Tetracycline | Gentamicin      | 0.5957         | <.0001*       |  |  |
| Tetracycline | Imipenem        | 0.1493         | 0.1990        |  |  |
| Tetracycline | Oxacillin       | 0.0565         | 0.6460        |  |  |
| Tetracycline | Penicillin      | 0.4239         | 0.0006*       |  |  |
| Tetracycline | Rifampin        | 0.1331         | 0.2522        |  |  |
| TMS          | Amikacin        | 0.2924         | 0.0226*       |  |  |
| TMS          | Ampicillin      | 0.5430         | <.0001*       |  |  |
| TMS          | Azithromycin    | 0.2608         | 0.0240*       |  |  |
| TMS          | Cefazolin       | 0.2045         | 0.0651        |  |  |
| TMS          | Chloramphenicol | 0.0863         | 0.4543        |  |  |
| TMS          | Clarithromycin  | 0.2149         | 0.0963        |  |  |

[illegible]
